# Supplementary material
Source: PubMed Central journal article supplement (PMC4169945)

## Dataset S2: Alignments of tumor-isolated Mps1<sup>WT</sup> and Mps1<sup>DK</sup> to annotated murine Mps1

### Tumor 63, p53<sup>ε/ε</sup>; MMTV-Cre<sup>+</sup> aligned to murine Mps1

Alignment: Assembled DNA alignment against reference molecule  
Parameters: Method: FastScan - Max Qual

Reference molecule: murine Mps1, Region 1 to 2493  
Number of sequences to align: 7  
Total length of aligned sequences with gaps: 2549 bps  
Settings: Similarity significance value cutoff: >= 100%

#### Summary of Percent Matches:

|                  |           |             |     |
|------------------|-----------|-------------|-----|
| Ref: murine Mps1 | 1 to 2493 | ( 2493 bps) | --  |
| 2: Pr 494 TID63  | 1 to 1529 | ( 1529 bps) | 61% |
| 3: Pr 503 TID63  | 1 to 968  | ( 968 bps)  | 44% |
| 4: Pr 500 TID63  | 1 to 1256 | ( 1256 bps) | 51% |
| 5: Pr 498 TID63  | 1 to 1360 | ( 1360 bps) | 90% |
| 6: Pr 501 TID63  | 1 to 1257 | ( 1257 bps) | 93% |
| 7: Pr 489 TID63  | 1 to 367  | ( 367 bps)  | 36% |

■ Areas of significant similarity (in windows 20 bases in length)

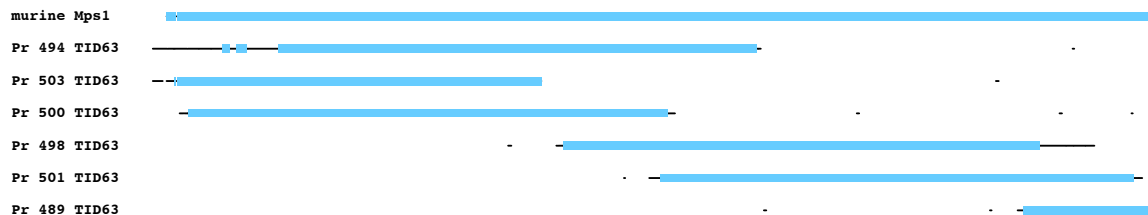

### Tumor 18, Mps1<sup>ε/ε</sup> p53<sup>ε/ε</sup>; Lck-Cre<sup>+</sup> aligned to murine Mps1

Alignment: Assembled DNA alignment against reference molecule  
Parameters: Method: FastScan - Max Qual

Reference molecule: murine Mps1, Region 1 to 2493  
Number of sequences to align: 7  
Total length of aligned sequences with gaps: 2620 bps  
Settings: Similarity significance value cutoff: >= 100%

#### Summary of Percent Matches:

|                  |           |             |     |
|------------------|-----------|-------------|-----|
| Ref: murine Mps1 | 1 to 2493 | ( 2493 bps) | --  |
| 2: Pr 494 TID18  | 1 to 1266 | ( 1266 bps) | 49% |
| 3: Pr 503 TID18  | 1 to 627  | ( 627 bps)  | 30% |
| 4: Pr 500 TID18  | 1 to 1352 | ( 1352 bps) | 61% |
| 5: Pr 501 TID18  | 1 to 1352 | ( 1352 bps) | 57% |
| 6: Pr 498 TID18  | 1 to 1326 | ( 1326 bps) | 62% |
| 7: Pr 489 TID18  | 1 to 366  | ( 366 bps)  | 90% |

■ Areas of significant similarity (in windows 20 bases in length)

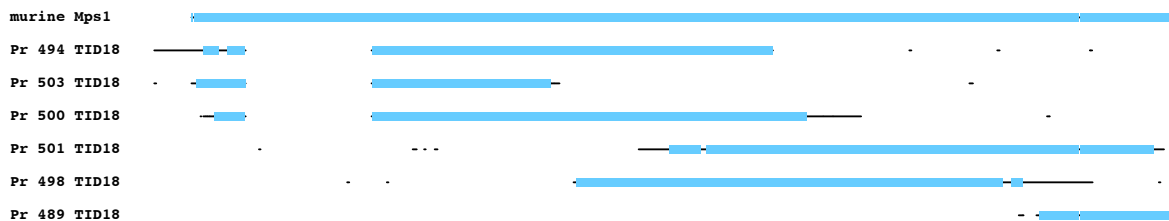

Supplement: pnas.1400892111.sd02.pdf [file pnas.1400892111.sd02.pdf]
